# Supplementary material for: ECAT1 is essential for human oocyte maturation and pre-implantation development of the resulting embryos
Source: PubMed Central journal article supplement (PMC5137016; doi:10.1038/srep38192), 2016-12-05
Supplement: srep38192-s1.pdf [file srep38192-s1.pdf]

ECAT1 is essential for human oocyte maturation and pre-implantation development of  
the resulting embryos

Changyu Liu<sup>1</sup>, Min Li<sup>2</sup>, Tianjie Li<sup>2</sup>, Hongcui Zhao<sup>2</sup>, Jin Huang<sup>2</sup>, Yun Wang<sup>2</sup>, Qian  
Gao<sup>2</sup>, Yang Yu<sup>2\*</sup> & Qinghua Shi<sup>1</sup>

Running title: ECAT1 is key to human oocyte maturation

<sup>1</sup>Molecular and Cell Genetics Laboratory; The CAS Key Laboratory of Innate Immunity and Chronic Disease; Hefei National Laboratory for Physical Sciences at Microscale; School of Life Sciences, University of Science and Technology of China, Hefei 230027, China.

<sup>2</sup>Beijing Key Laboratory of Reproductive Endocrinology and Assisted Reproductive Technology and Key Laboratory of Assisted Reproduction, Ministry of Education, Center of Reproductive Medicine, Department of Obstetrics and Gynecology, Peking University Third Hospital, Beijing 100191, China.

\* Corresponding authors

Yang Yu, Ph.D.

Mailing address: Department of Obstetrics and Gynecology, Peking University Third Hospital, No. 49 HuaYuan North Road, HaiDian District, Beijing 100191, the People's Republic of China

Tel:/Fax: +86-10- 82266753

E-mail: yuyang5012@hotmail.com

Table S1 DNA or RNA sequence of qRT-PCR and ECAT1 siRNAs

| Sequence Name           | Sequence (5'-3')       | Application |
|-------------------------|------------------------|-------------|
| ECAT1 Forward           | TGATCATGAACCTGGCTGAC   | qRT-PCR     |
| ECAT1 Reverse           | GCCTCCCGGACTTCTATTG    | qRT-PCR     |
| GAPDH Forward           | CTTTGGTATCGTGGAAGGACTC | qRT-PCR     |
| GAPDH Reverse           | AGTAGAGGCAGGGATGATGT   | qRT-PCR     |
| ECAT1 siRNA Sense-1     | CAGGAGGACACAAUCAAGATT  | RNAi        |
| ECAT1 siRNA Antisense-1 | UCUUGAUUGUGUCCUCCUGTT  | RNAi        |
| ECAT1 siRNA Sense-2     | CCAGCGGUCUCAAUAGAATT   | RNAi        |
| ECAT1 siRNA Antisense-2 | UUCUAUUGAAGACCGCUGGTT  | RNAi        |
| ECAT1 siRNA Sense-3     | GGACCCAGUUACUAGAUAUATT | RNAi        |
| ECAT1 siRNA Antisense-3 | UAAUCUAGUAACUGGGUCCTT  | RNAi        |
